# Supplementary material for: A practical way to enhance the synthesis of N8−from an N3−precursor, studied by both computational and experimental methods
Source: Royal Society of Chemistry journal article supplement (doi:10.1039/d0cp06053d), 2021-01-01
Supplement: d0cp06053d1.pdf [file d0cp06053d1.pdf]

Supplementary Information:

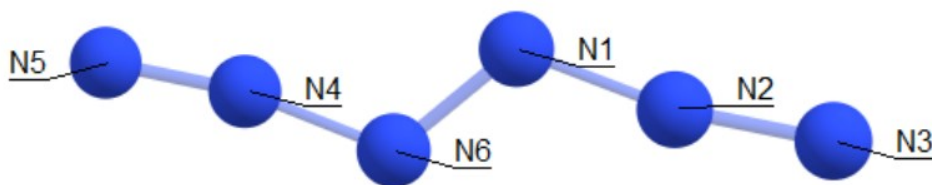

Fig. S1: Molecular structure of N<sub>6</sub> creating from two N<sub>3</sub> molecules.

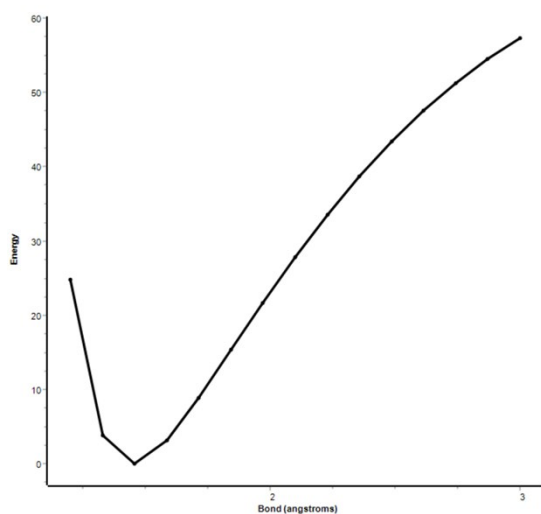

Fig. S2: N<sub>3</sub> to N<sub>6</sub> Saddlepoint Surface Scan. Energies are in kcal/mol

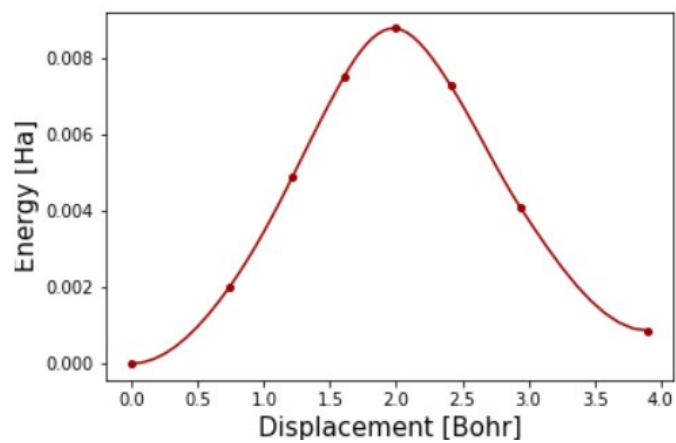

Fig. S3: NEB for EEE N<sub>8</sub><sup>\*</sup> to ZEZ N<sub>8</sub><sup>-</sup>

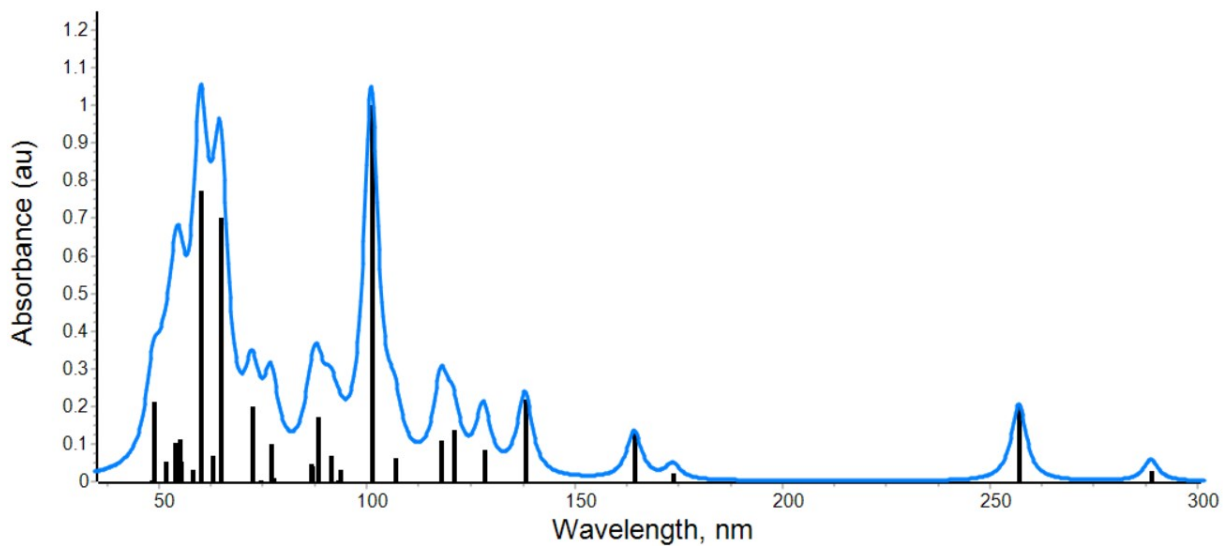

Fig. S4: TD-DFT, CAM-B3LYP functional for  $N_3^-$  to  $N_3^*$

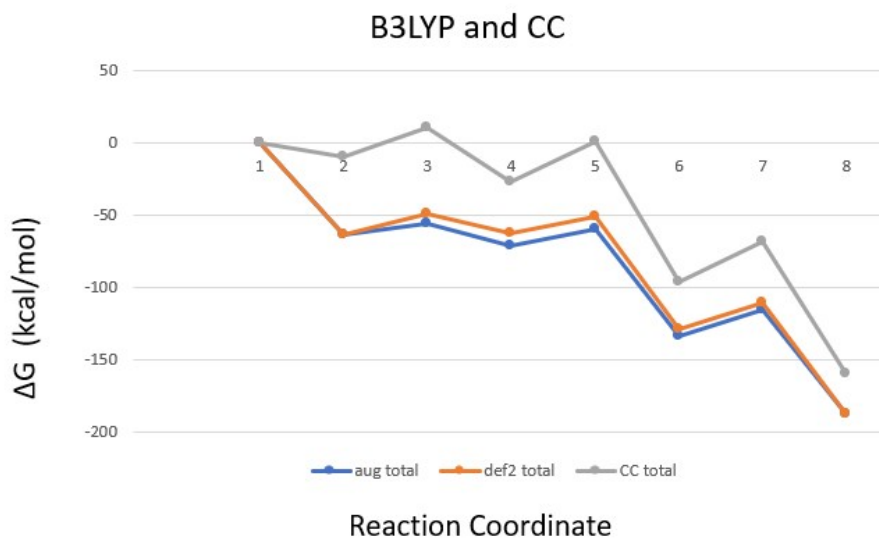

Fig S5: Comparison of single point energies for aug-ss-pVDZ, TZVPP, and Coupled Cluster theory.

Table S1: Vibrational Frequencies of Transition States

| Transition State | Vibrational Frequency for Imaginary Mode (1/cm) |
|------------------|-------------------------------------------------|
| N6 to N12        | -82.44                                          |
| N12 to N10       | -625.4                                          |
| N10 to N8        | -729.59                                         |

Table S2: Single-point energies for def2-TZVPP and aug-ss-pVDZ basis sets, and Coupled Cluster theory

|            |      | aug total | def2 total | CC total |
|------------|------|-----------|------------|----------|
|            | Step |           |            |          |
| N3*        | 1    | 0         | 0          | 0        |
| N6         | 2    | -63.1386  | -63.2772   | -8.8956  |
| N6toN12TS  | 3    | -55.491   | -48.2605   | 11.07253 |
| N12        | 4    | -70.5789  | -61.9227   | -26.6616 |
| N12toN10TS | 5    | -59.6099  | -50.5638   | 1.503936 |
| N10        | 6    | -133.006  | -128.615   | -95.9427 |
| N10toN8TS  | 7    | -115.295  | -110.562   | -67.7879 |
| N8*        | 8    | -187.582  | -187.557   | -158.911 |

Coordinates for All Mechanism Steps:

Azide Radical:

N 1.105350000 0.013400000 -0.092010000  
 N 2.290140000 0.013400000 -0.092010000  
 N 3.474950000 0.013400000 -0.092010000

N6:

N 0.965225000 0.553455000 -0.249708000  
 N 2.107429000 0.126799000 -0.112684000

|   |              |              |              |
|---|--------------|--------------|--------------|
| N | 3.149043000  | -0.179023000 | -0.014149000 |
| N | -1.063382000 | -0.090661000 | -0.070402000 |
| N | -2.105334000 | 0.217050000  | -0.158995000 |
| N | 0.079139000  | -0.521251000 | 0.050288000  |

N6 to N12 TS:

|   |                   |                   |                   |
|---|-------------------|-------------------|-------------------|
| N | 4.92095367993796  | -0.97840539898874 | 0.44222265292877  |
| N | 3.95351641747798  | -0.56029269005302 | 0.85473102335250  |
| N | 2.81772790795973  | -0.27192854076957 | 1.32216914454285  |
| N | 2.68514686254232  | 1.13142442940902  | 1.42023253287303  |
| N | 1.60573539058246  | 1.50463564769842  | 1.90215613593268  |
| N | 0.77130178145777  | 0.52523177664367  | 2.45715174853024  |
| N | -0.34431049360878 | 0.52761248974984  | 1.91881348623023  |
| N | -1.21076600719656 | -0.34208412951333 | 2.65888093550757  |
| N | -1.88267322617817 | -1.14979830985734 | 2.02424190529131  |
| N | -1.59264410812149 | -1.31393177826565 | 0.57421445836582  |
| N | -1.97704133463985 | -0.34169623446418 | -0.10401341917962 |
| N | -2.31265687021341 | 0.47538273841092  | -0.82384060437548 |

N12:

|   |              |              |              |
|---|--------------|--------------|--------------|
| N | 1.382489000  | -0.354864000 | -0.456367000 |
| N | 0.446781000  | -0.964107000 | -1.231734000 |
| N | 2.494582000  | -0.623834000 | -0.840373000 |
| N | -0.683348000 | -0.646654000 | -0.769684000 |
| N | 3.402405000  | 0.029278000  | -0.017464000 |
| N | -1.700844000 | -0.447565000 | -0.467347000 |
| N | 7.495211000  | 0.665188000  | 0.850633000  |

|   |             |              |              |
|---|-------------|--------------|--------------|
| N | 6.538981000 | 0.072855000  | 0.089159000  |
| N | 8.609937000 | 0.286369000  | 0.395300000  |
| N | 5.433003000 | 0.391909000  | 0.452651000  |
| N | 9.615191000 | 0.032316000  | 0.093713000  |
| N | 4.518272000 | -0.255250000 | -0.367548000 |

N12 to N10 TS:

|   |         |          |          |
|---|---------|----------|----------|
| N | 1.29254 | -1.34437 | -1.69112 |
| N | 0.37548 | -0.86532 | -1.085   |
| N | 2.57015 | -1.43393 | -1.8057  |
| N | 0.6689  | 0.10264  | 0.13624  |
| N | 3.14267 | -0.6515  | -0.81973 |
| N | 0.09831 | 0.69811  | 0.88541  |
| N | 6.74985 | 0.78927  | 0.99348  |
| N | 6.18078 | 0.00413  | 0.00466  |
| N | 8.01112 | 0.73012  | 0.91804  |
| N | 4.93073 | 0.07964  | 0.10015  |
| N | 9.13782 | 0.79961  | 1.00478  |
| N | 4.39427 | -0.72277 | -0.91027 |

N10:

|   |             |              |              |
|---|-------------|--------------|--------------|
| N | 1.506354000 | -1.071609000 | -1.258509000 |
| N | 0.436463000 | -1.046869000 | -1.107324000 |
| N | 2.725763000 | -1.185522000 | -1.543813000 |
| N | 3.416565000 | -0.442594000 | -0.631209000 |
| N | 7.130705000 | 0.805987000  | 0.931966000  |
| N | 6.441426000 | 0.068433000  | 0.012896000  |
| N | 8.349933000 | 0.546278000  | 0.771337000  |
| N | 5.255069000 | 0.240443000  | 0.131813000  |

|   |             |              |              |
|---|-------------|--------------|--------------|
| N | 9.419767000 | 0.398897000  | 0.723741000  |
| N | 4.602846000 | -0.529650000 | -0.821112000 |

N10 to N8 TS:

|   |         |           |          |
|---|---------|-----------|----------|
| N | 1.40649 | -1.086531 | -1.36533 |
| N | 0.27251 | -1.110173 | -1.39305 |
| N | 2.65483 | -1.188249 | -1.49594 |
| N | 3.30046 | -0.418533 | -0.52638 |
| N | 7.12897 | 0.759012  | 0.95457  |
| N | 6.42036 | 0.085693  | 0.10628  |
| N | 8.64672 | 0.473752  | 0.59466  |
| N | 5.16855 | 0.232098  | 0.2917   |
| N | 9.74866 | 0.576311  | 0.72392  |
| N | 4.5373  | -0.539584 | -0.68065 |

ZEZ N8

|   |              |              |              |
|---|--------------|--------------|--------------|
| N | -1.027722000 | -1.153156000 | -0.000251000 |
| N | -0.465008000 | -0.231091000 | -0.000419000 |
| N | 0.091147000  | 0.898079000  | -0.000783000 |
| N | 1.462611000  | 0.801121000  | -0.000729000 |
| N | 1.919794000  | -0.310573000 | -0.001070000 |
| N | 3.291099000  | -0.408015000 | -0.000908000 |
| N | 3.847789000  | 0.720882000  | 0.000864000  |
| N | 4.411499000  | 1.642313000  | 0.002506000  |
